# Supplementary material
Source: publisher figshare collection journal article supplement (https://sage.figshare.com/ndownloader/files/14625542)
Supplement: Supplementary file 1 [file 14625542]

## Appendix 1 - Participant Characteristics

| Case No. & Reference | Referred By...           | Male / Female Carer – Male / Female | Age Carer Age | Dementia Diagnosis                              | Rockwood Clinical Frailty Score | No of sessions | Notes                                                                                            |
|----------------------|--------------------------|-------------------------------------|---------------|-------------------------------------------------|---------------------------------|----------------|--------------------------------------------------------------------------------------------------|
| 1 A&B                | Crossroads Care          | M<br>F – Wife                       | 76<br>72      | Alzheimer's Disease                             | 7                               | 12             |                                                                                                  |
| 2 C&D                | Community Dementia Nurse | F<br>M – Husband                    | 84<br>84      | Vascular Dementia                               | 6                               | 12             | *MT continued at the couples' request, subsidised by Mindsong.                                   |
| 3 E&F                | Crossroads Care          | M<br>F – Wife                       | 73<br>70      | Parkinson's Disease with dementia symptoms      | 6                               | 12             |                                                                                                  |
| 4 G&H                | Day Centre               | F<br>M – Husband                    | 80<br>83      | Frontal Lobe Dementia                           | 6                               | 12             |                                                                                                  |
| 5 J&K                | Day Centre               | F<br>M – Husband                    | 70<br>73      | Radiation Dementia - from proton beam treatment | 5/6                             | 12             | *MT restarted after a 3 month break as patient's condition has deteriorated. Funded by Mindsong. |
| 6 L&M                | Day Centre               | M<br>F – Wife                       | 82<br>73      | Mixed - Vascular Dementia & Alzheimer's Disease | 6                               | 12             | *MT continued at the couples' request, subsidised by Mindsong                                    |
| 7 N&P                | Day Centre               | M<br>F – Wife                       | 81<br>77      | Vascular Dementia                               | 6                               | 12             |                                                                                                  |
| 8 Q&R                | Crossroads Care          | M<br>F – Wife                       |               | Alzheimer's Disease                             | 6                               | 1              | Had to withdraw from project due to illness.                                                     |

\*MT = Music Therapy

### Referrals contacted / visited but not progressed

| Case No. & Reference | Referred By...  | Frailty Score | Visited | Reason for not continuing                                                                                             |
|----------------------|-----------------|---------------|---------|-----------------------------------------------------------------------------------------------------------------------|
| 9 S                  | Day Centre      | 6             | Yes     | Complex needs but predominantly physical. Early stages of dementia. Singing for the Brain recommended for the couple. |
| 10 T                 | Crossroads Care | 6             | Yes     | Didn't agree to participate.                                                                                          |
| 11 U                 | Day Centre      | 6             | Yes     | Adamant that Mindsong was not for him. Wife would have liked it.                                                      |
| 12 V                 | Crossroads Care | 7             | No      | Carer didn't want Mindsong to visit as husband's behaviour too difficult.                                             |
| 13 W                 | Crossroads Care | 8             | No      | Aged 101 and looking at end of life care                                                                              |
| 14 X                 | Crossroads Care | -             | No      | Outside study area                                                                                                    |
